# Supplementary material for: Synthesis and characterization of heteroleptic rare earth double-decker complexes involving tetradiazepinoporphyrazine and phthalocyanine macrocycles
Source: Royal Society of Chemistry journal article supplement (doi:10.1039/d1dt00088h), 2021-01-01
Supplement: d1dt00088h1.pdf [file d1dt00088h1.pdf]

## Supporting Information

### Synthesis and characterization of heteroleptic rare earth double-decker complexes involving tetradiazepinoporphyrzine and phthalocyanine macrocycles

Ekaterina N. Tarakanova,\*<sup>a,b</sup> Pavel A. Tarakanov,<sup>b,c</sup> Anton O. Simakov,<sup>b</sup> Taniyuki Furuyama,<sup>d</sup> Nagao Kobayashi,<sup>e</sup> Dmitry V. Konev,<sup>c,f</sup> Olga A. Goncharova,<sup>c</sup> Stanislav A. Trashin,<sup>b,g</sup> Karolien De Wael,<sup>g</sup> Ilya V. Sulimenkov,<sup>h</sup> Vasily V. Filatov,<sup>h</sup> Viatcheslav I. Kozlovskiy,<sup>h</sup> Larisa G. Tomilova,<sup>† b,i</sup> Pavel A. Stuzhin,<sup>a</sup> and Victor E. Pushkarev \*<sup>b</sup>

<sup>a</sup> Research Institute of Macroheterocycles, Ivanovo State University of Chemistry and Technology, RF-153000 Ivanovo, Russia

E-mail: tarakanova.ek.nik@gmail.com

<sup>b</sup> Institute of Physiologically Active Compounds, Russian Academy of Sciences, 1 Severny Proezd, Chernogolovka 142432, Moscow Region, Russian Federation

E-mail: pushkarev@ipac.ac.ru

<sup>c</sup> Institute of Problems of Chemical Physics, Russian Academy of Sciences, 1 Academician Semenov Avenue, Chernogolovka 142432, Moscow Region, Russian Federation

<sup>d</sup> Graduate School of Natural Science and Technology, Kanazawa University, Kakuma-machi, Kanazawa, 920-1192, Japan

<sup>e</sup> Faculty of Textile Science and Technology, Shinshu University, Tokida, Ueda, 386-8567, Japan

<sup>f</sup> D. I. Mendeleev University of Chemical Technology of Russia, Miusskaya sq. 9, 125047, Moscow, Russian Federation

<sup>g</sup> AXES Research Group, Department of Chemistry, University of Antwerp, Groenenborgerlaan 171, 2020 Antwerpen, Belgium

<sup>h</sup> Chernogolovka Branch of the N.N. Semenov Federal Research Center for Chemical Physics, Russian Academy of Sciences, 1/10 Academician Semenov Avenue, Chernogolovka 142432, Moscow Region, Russian Federation

<sup>i</sup> Department of Chemistry, M.V. Lomonosov Moscow State University, 1 Leninskie Gory, 119991 Moscow, Russian Federation

<sup>†</sup> Dedicated to the memory of the late Professor Larisa Tomilova.

### Table of Contents

|                                                                               |     |
|-------------------------------------------------------------------------------|-----|
| Stability of the lanthanum(III) double-deckers studied by UV-Vis spectroscopy | S1  |
| High-resolution mass spectra                                                  | S3  |
| <sup>1</sup> H NMR spectra                                                    | S5  |
| DFT optimized structure of dimeric sandwich complex                           | S9  |
| Electronic absorption and MCD spectra                                         | S10 |
| Electrochemistry                                                              | S12 |
| DFT calculation details                                                       | S15 |

## Stability of the lanthanum(III) double-deckers studied by UV-Vis spectroscopy

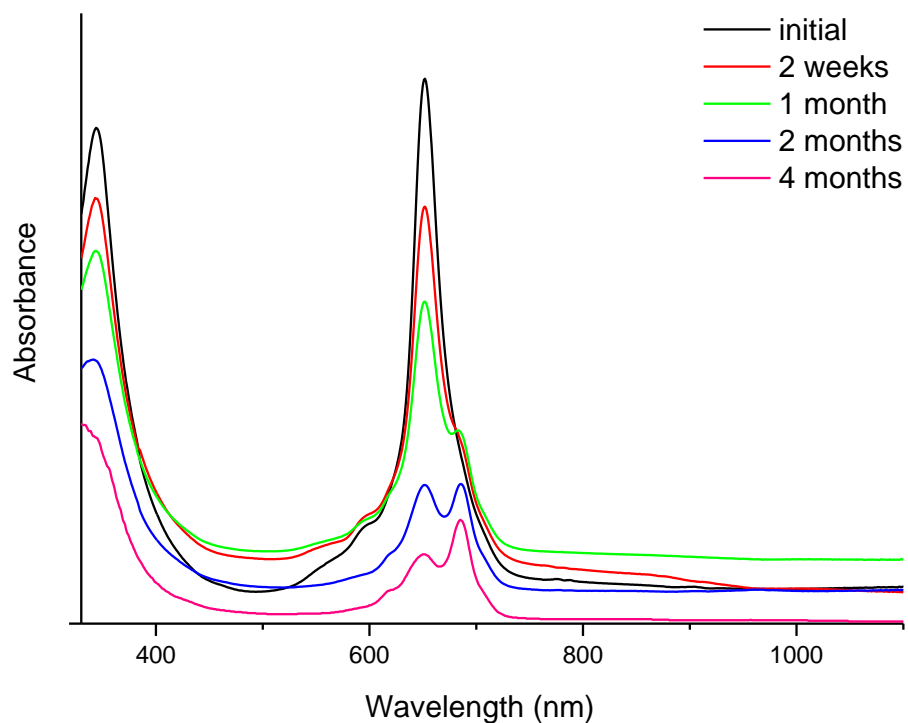

**Figure S1** Stability of the reduced non-radical form of  $(^{\text{Bu}}\text{Pc})_2\text{La}$  ( $C = 5 \cdot 10^{-6}$  M) in Py studied by UV-Vis spectroscopy.

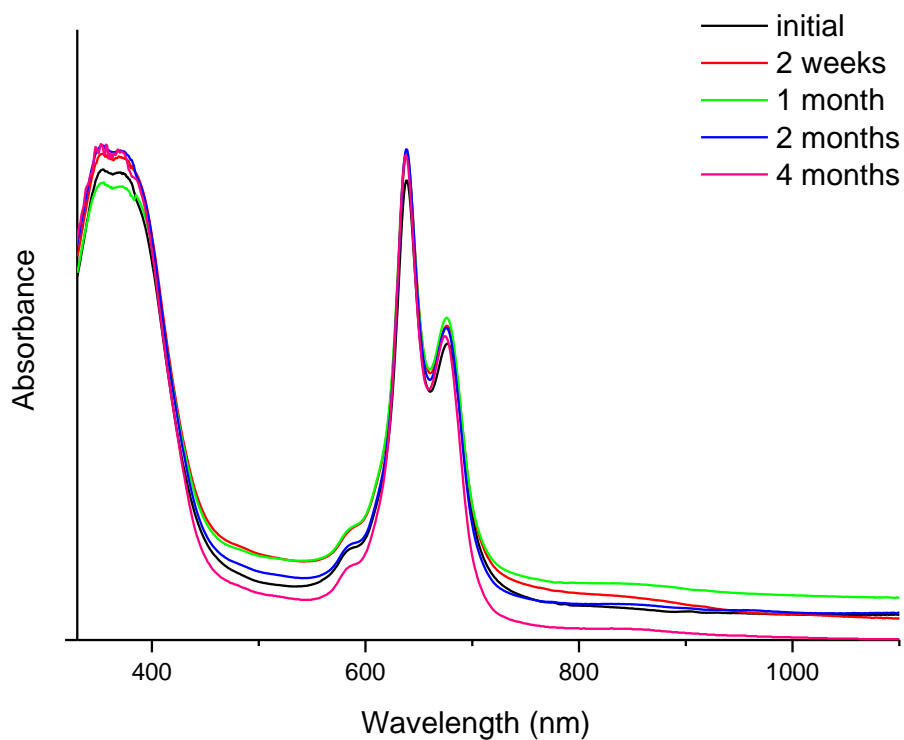

**Figure S2** Stability of the reduced non-radical form of  $(^{\text{BuPh}}\text{DzPz})_2\text{La}$  ( $C = 5 \cdot 10^{-6}$  M) in Py studied by UV-Vis spectroscopy.

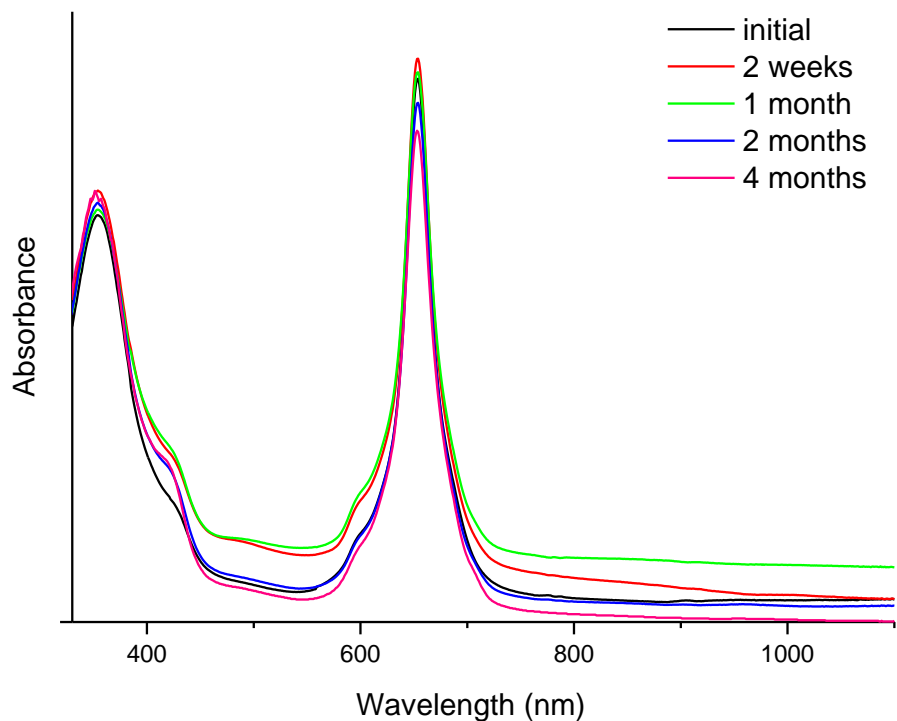

**Figure S3** Stability of the reduced non-radical form of (<sup>tBuPh</sup>DzPz)La(<sup>tBu</sup>Pc) ( $C = 6 \cdot 10^{-6}$  M) in Py studied by UV-Vis spectroscopy.

### High resolution mass spectra

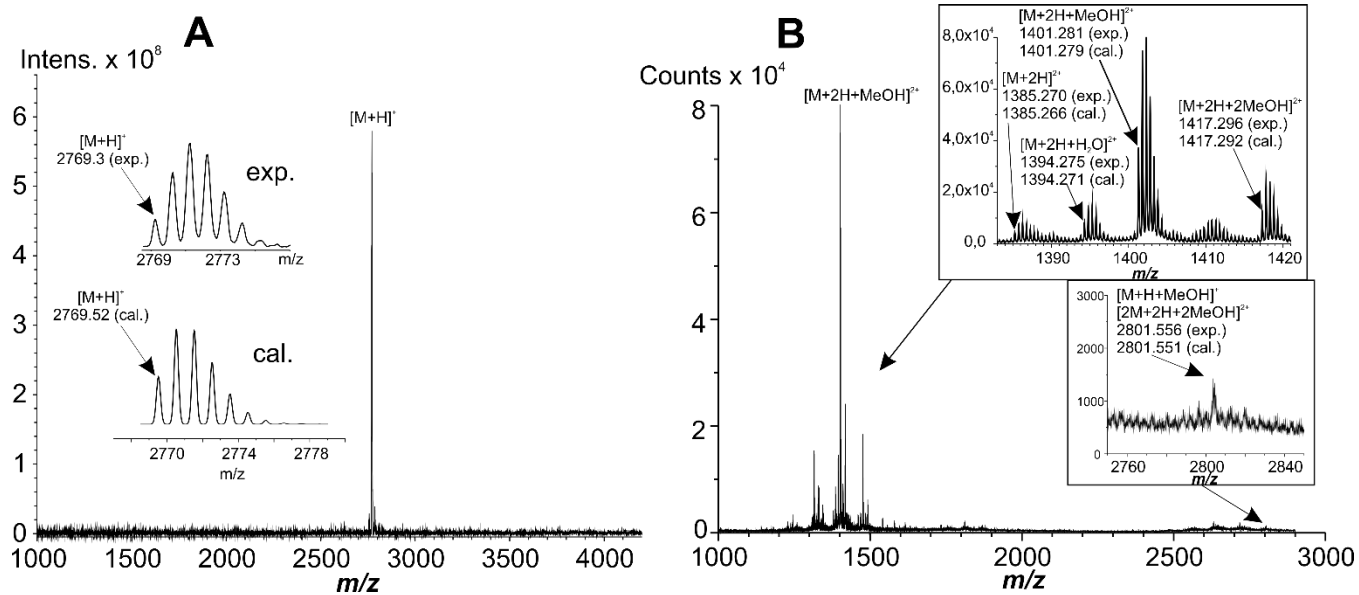

**Figure S4** MALDI-TOF (A) and ESI-TOF (B) mass spectra of **3a**.

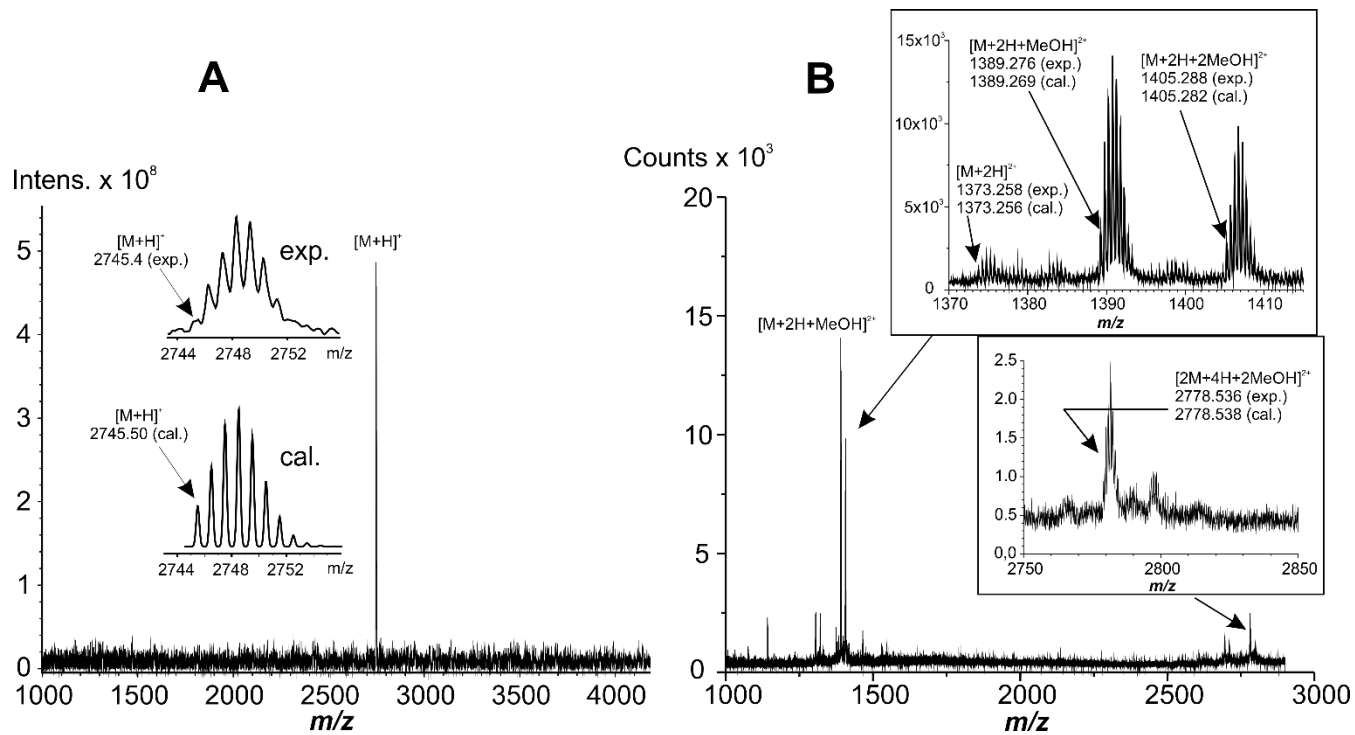

Figure S5 MALDI-TOF (A) and ESI-TOF (B) mass spectra of **3b**.

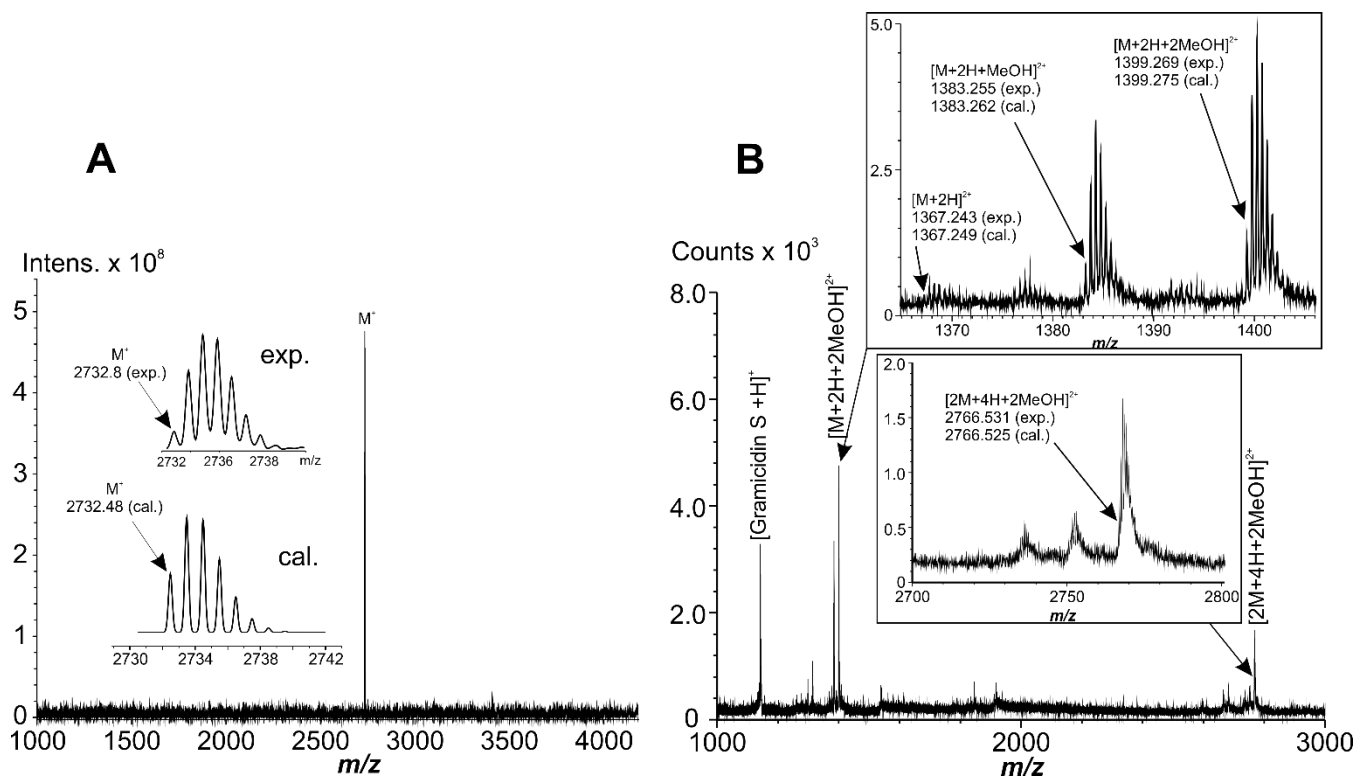

Figure S6 MALDI-TOF (A) and ESI-TOF (B) mass spectra of **3c**. Gramicidin S applied as reference.

# $^1\text{H}$ NMR spectra

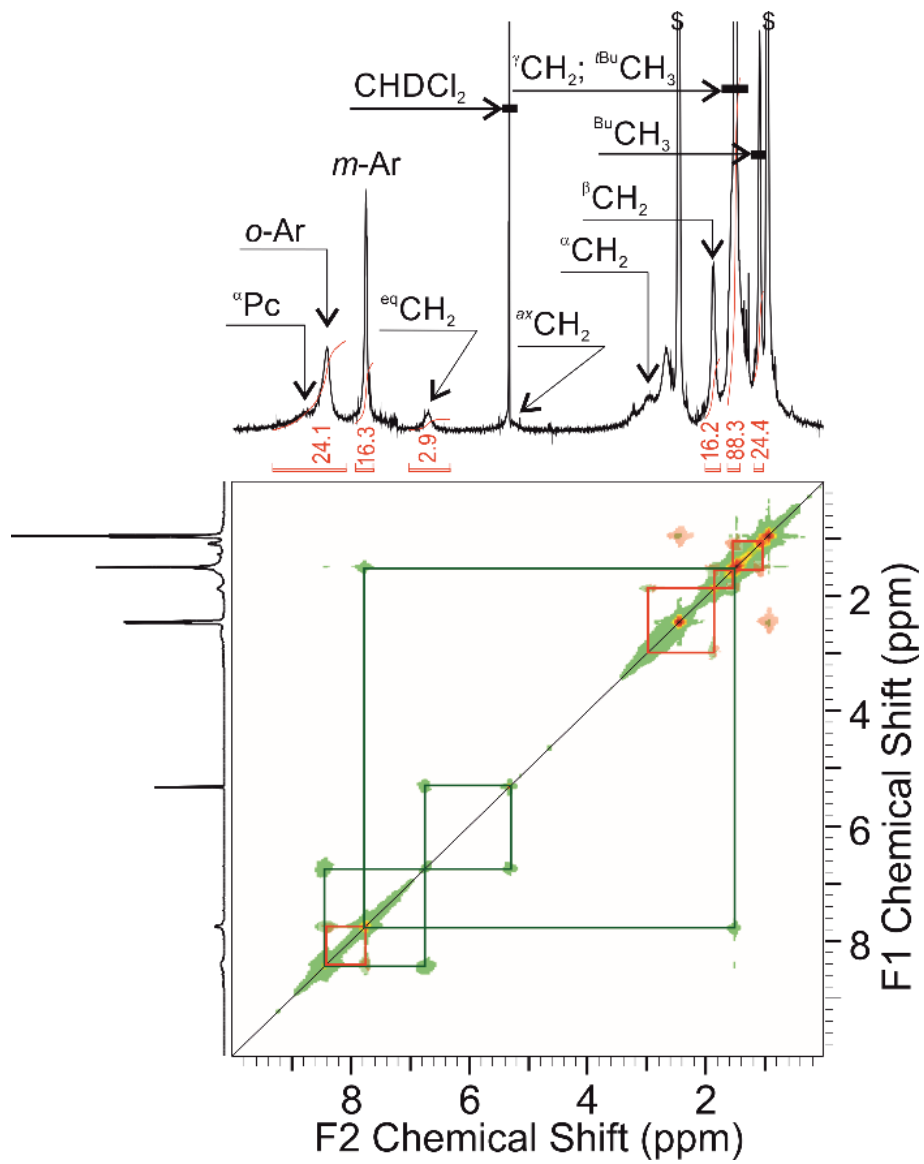

**Figure S7** Superimposed  $^1\text{H}$ - $^1\text{H}$  COSY (red) and  $^1\text{H}$ - $^1\text{H}$  NOESY (green) spectra of **3a** in  $\text{CD}_2\text{Cl}_2$ . \$ Signals of  $\text{Et}_3\text{N}$ .

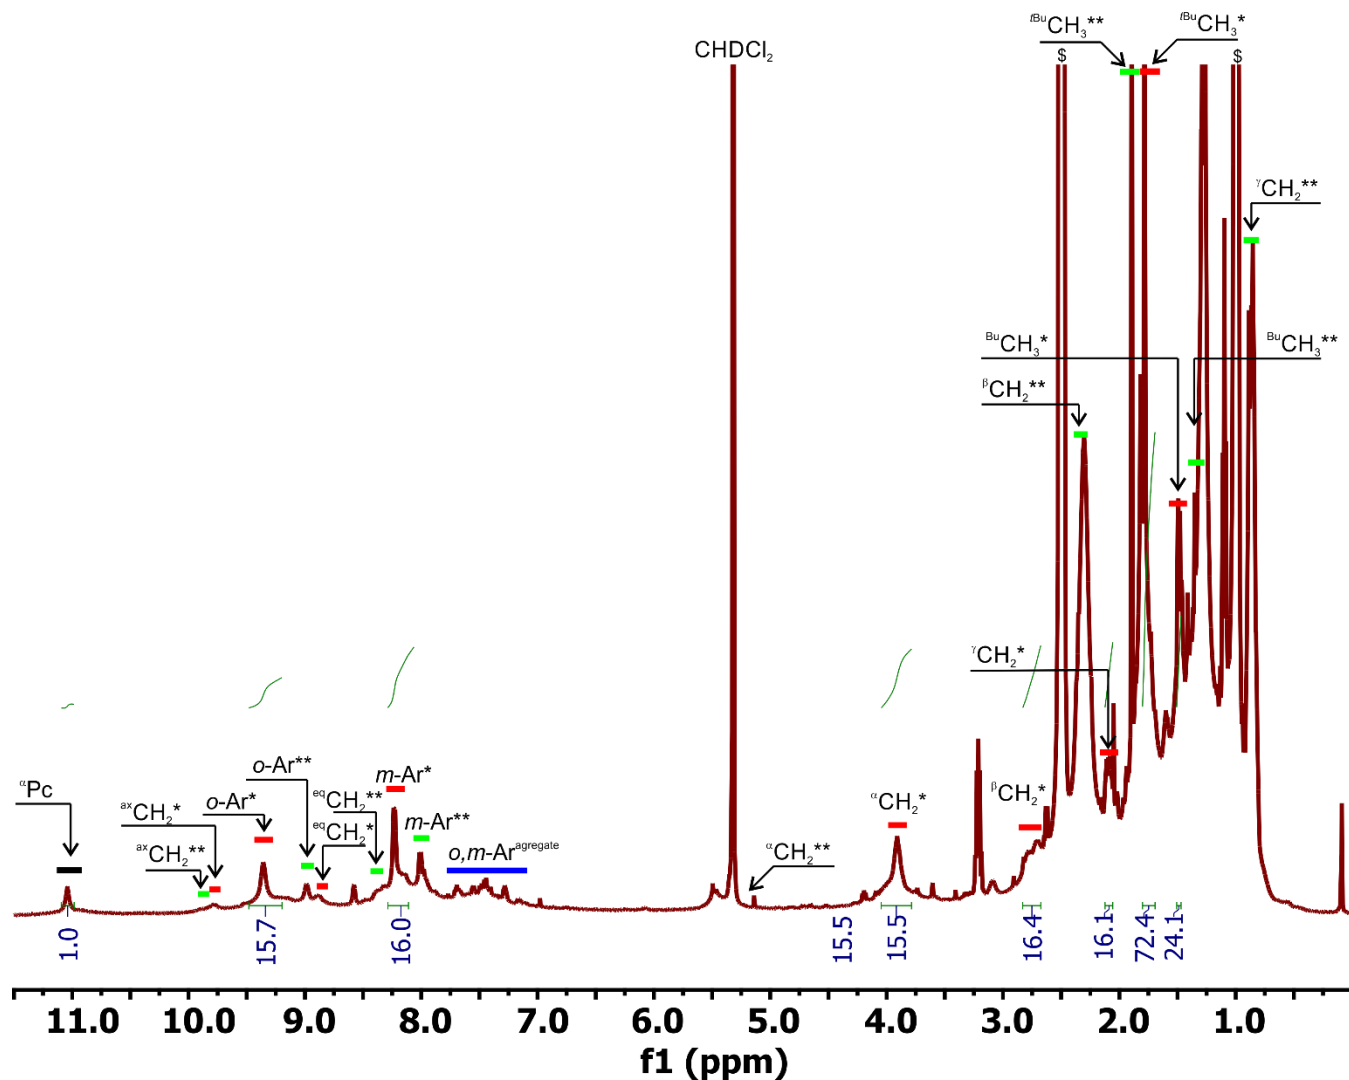

Figure S8  $^1\text{H}$  NMR spectrum of **3b** in  $\text{CD}_2\text{Cl}_2$ . Proton signals of the monomeric (\*) and dimeric (\*\*) forms. Signals of  $\text{Et}_3\text{N}$  ( $\text{\$}$ ).

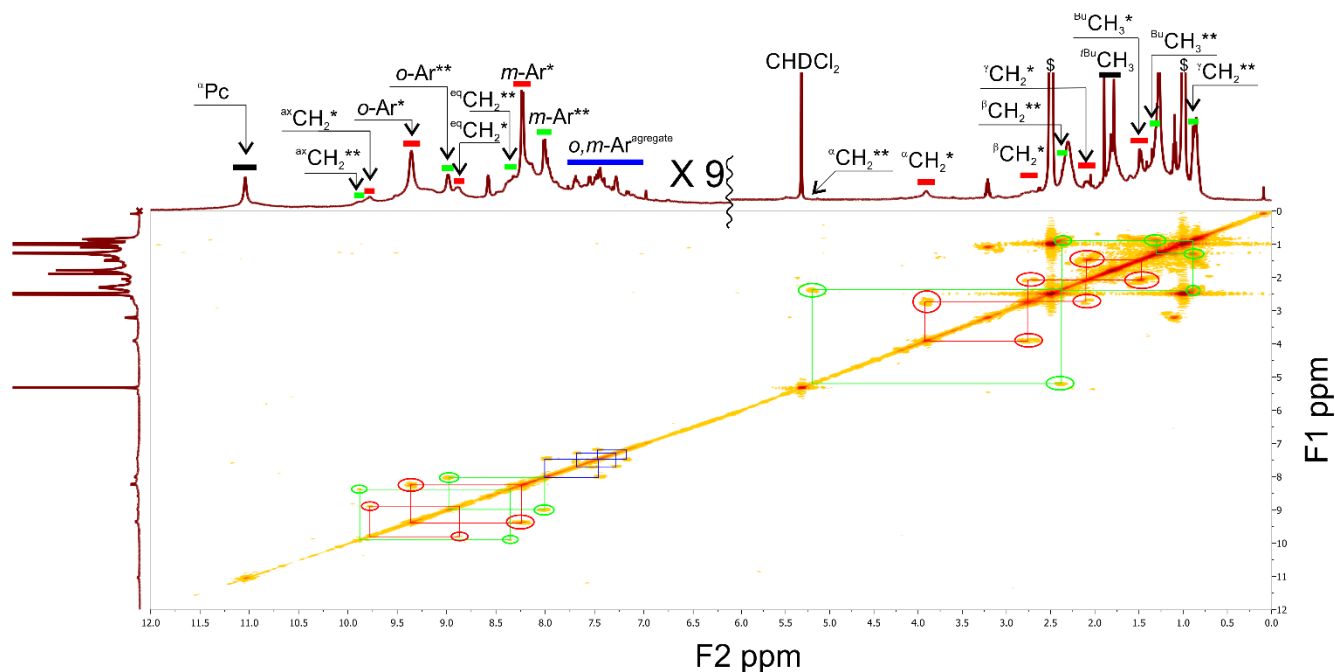

Figure S9  $^1\text{H}$ - $^1\text{H}$  COSY of **3b** in  $\text{CD}_2\text{Cl}_2$ . Proton signals of the monomeric (\*) and dimeric (\*\*) forms. Signals of  $\text{Et}_3\text{N}$  ( $\text{\$}$ ).

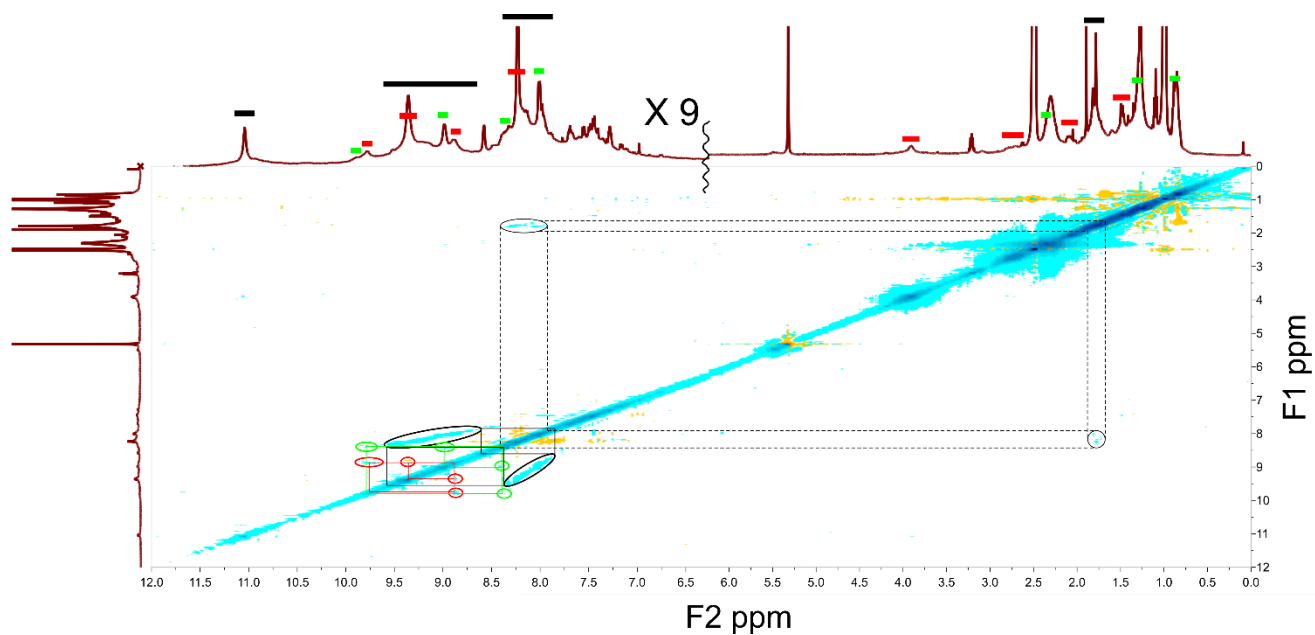

Figure S10  $^1\text{H}$ - $^1\text{H}$  NOESY of **3b** in  $\text{CD}_2\text{Cl}_2$ . Proton signals of the monomeric (red line) and dimeric (green line) forms.

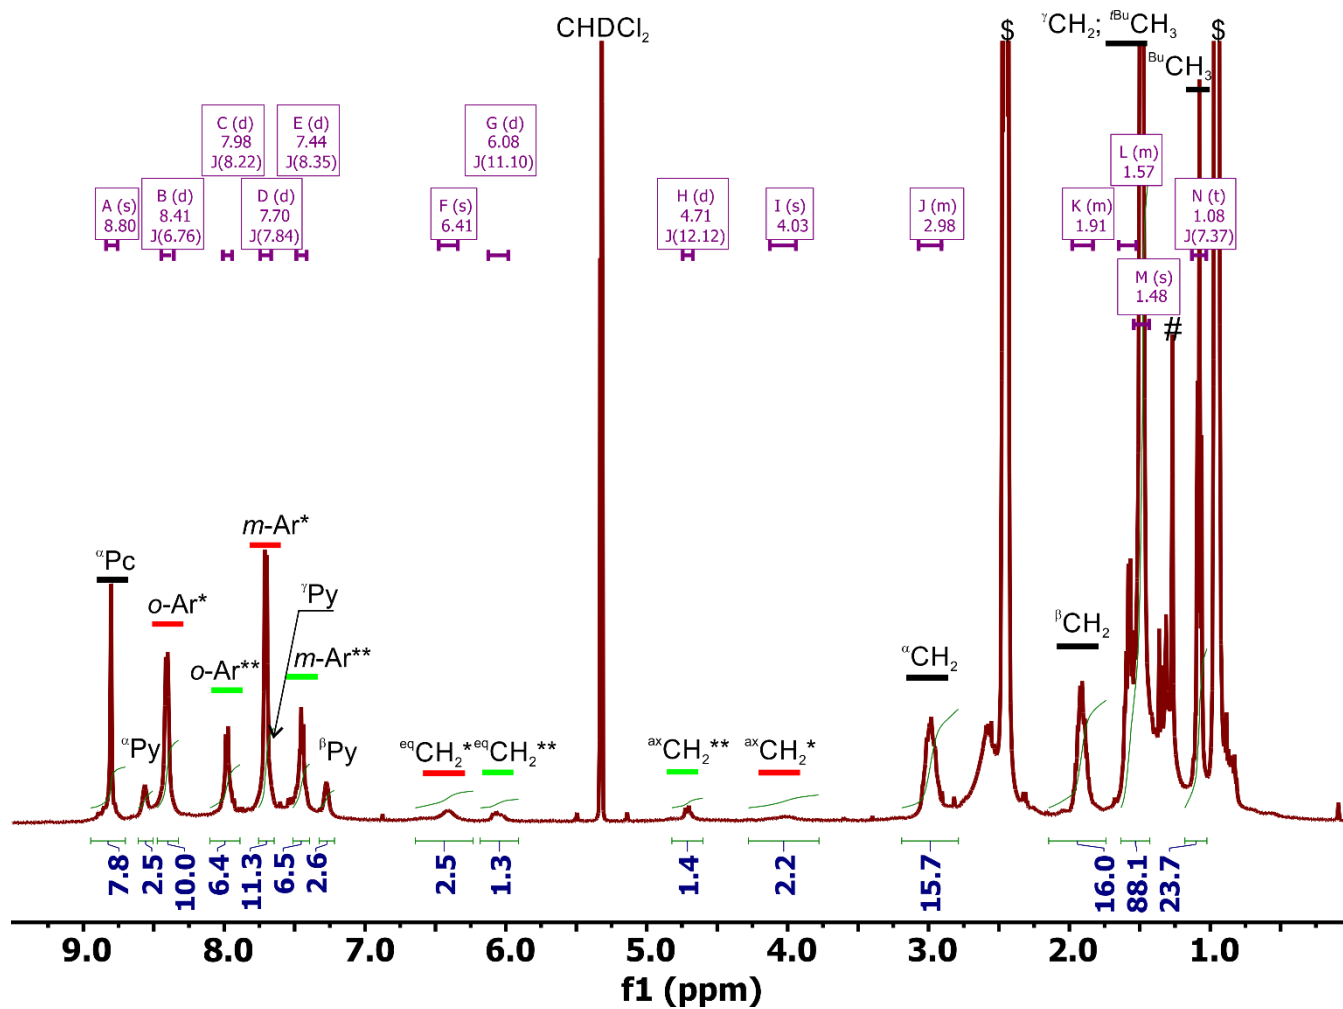

Figure S11  $^1\text{H}$  NMR spectrum of **3c** in  $\text{CD}_2\text{Cl}_2$ . Proton signals of the monomeric (\*) and dimeric (\*\*) forms. Signals of  $\text{Et}_3\text{N}$  (\$).

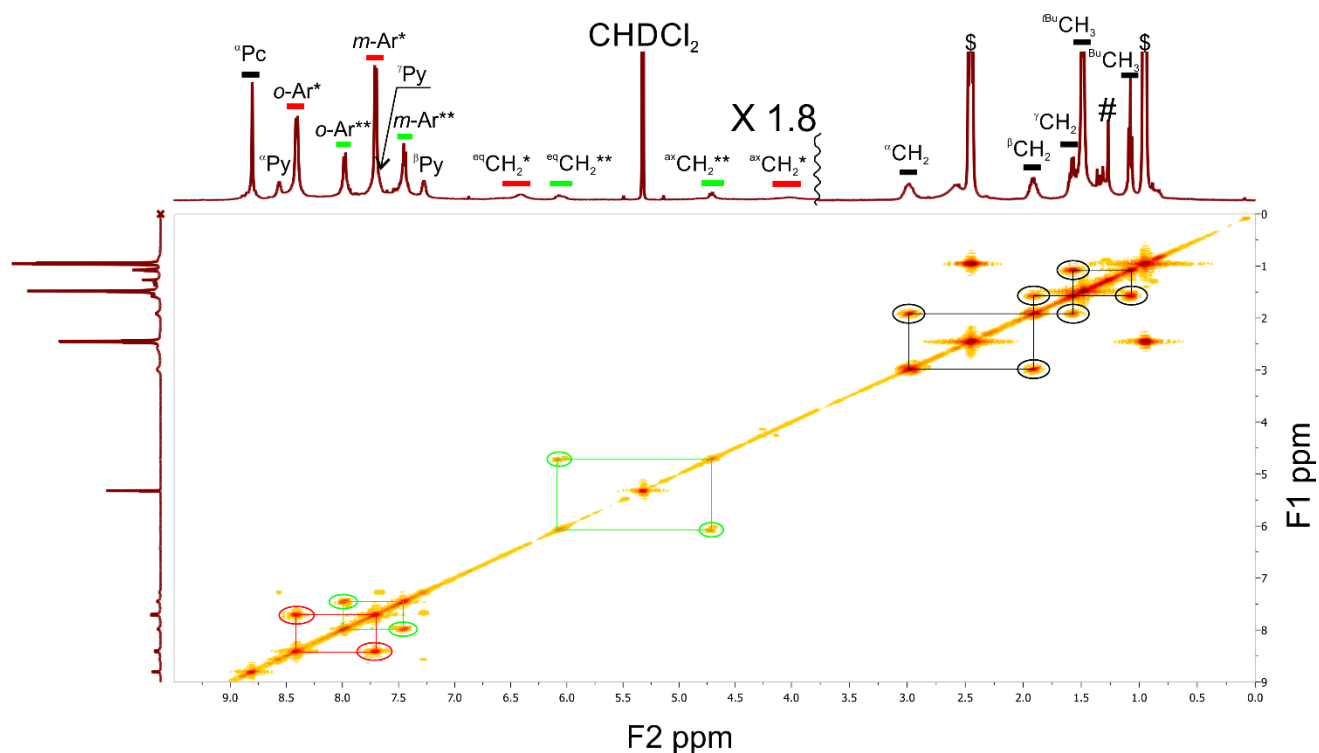

Figure S12  $^1\text{H}$ - $^1\text{H}$  COSY of **3c** in  $\text{CD}_2\text{Cl}_2$ . Proton signals of the monomeric (\*) and dimeric (\*\*) forms. Signals of  $\text{Et}_3\text{N}$  (\$).

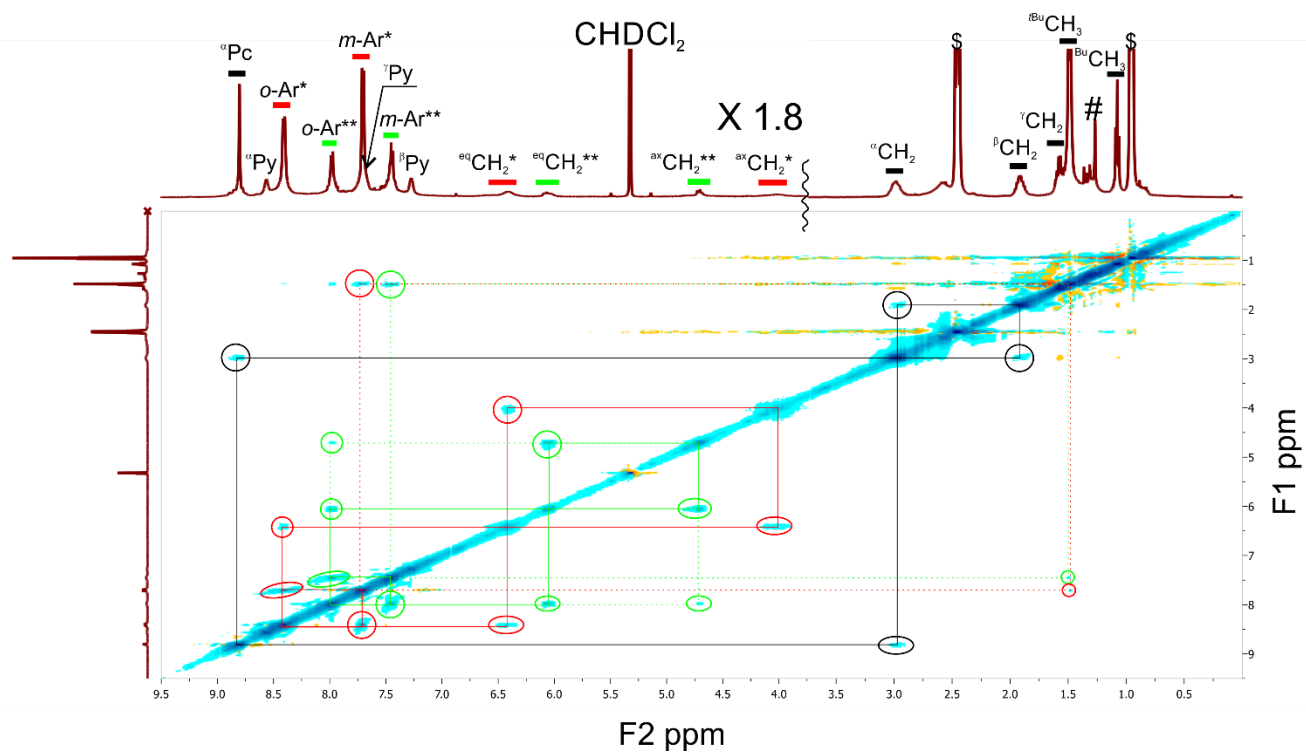

Figure S13  $^1\text{H}$ - $^1\text{H}$  NOESY of **3c** in  $\text{CD}_2\text{Cl}_2$ . Proton signals of the monomeric (\*) and dimeric (\*\*) forms. Signals of  $\text{Et}_3\text{N}$  (\$).



### DFT optimized structure of dimeric sandwich complex

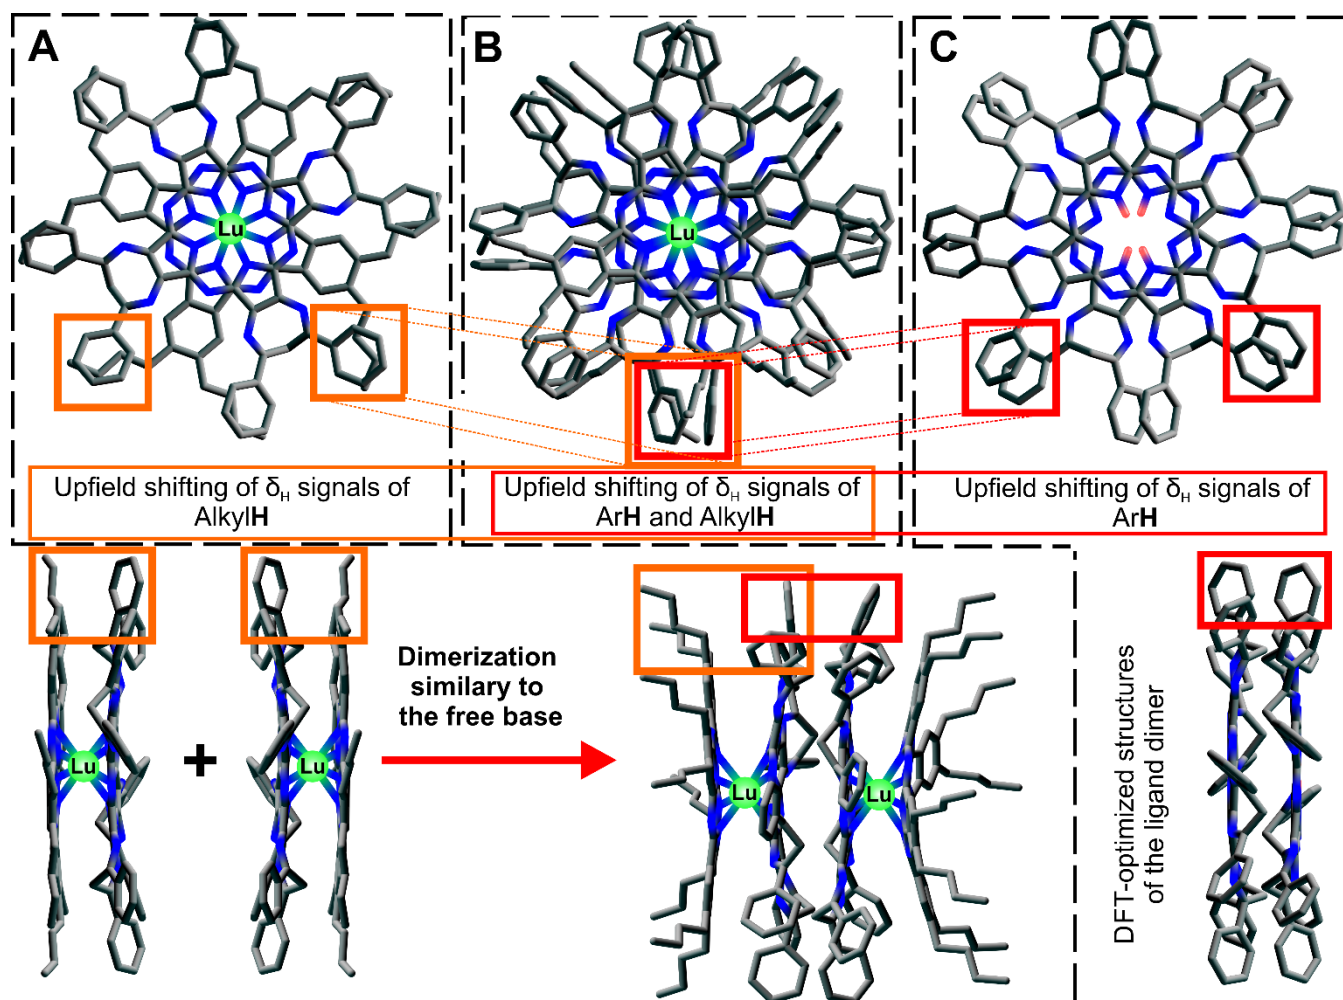

**Figure S14** Calculated structures of  $(^{Ph}DzPz)Lu(^{Bu}Pc)$  (A), dimer  $\{(^{Ph}DzPz)Lu(^{Bu}Pc)\}_2$  (B) and dimeric free base  $\{(^{Ph}DzPzH_2)\}_2$  (C)<sup>[1]</sup>.

## UV-Vis/NIR, MCD spectroscopy

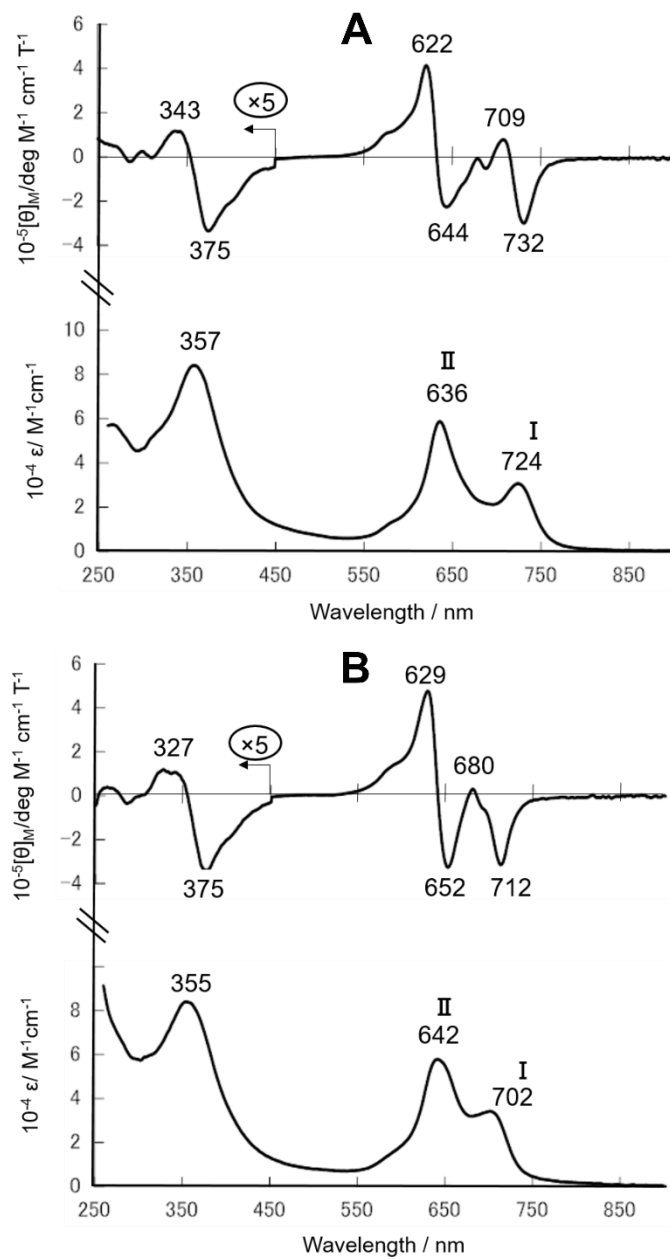

**Figure S15** Electronic absorption and MCD spectra of the reduced non-radical forms of **3a** ( $1.7 \cdot 10^{-5}$  M) (A) and **3b** ( $1.2 \cdot 10^{-5}$  M) (B) in DCM.

**Table S1** UV-Vis/NIR data for homoleptic (<sup>Bu</sup>Pc)<sub>2</sub>Ln and (<sup>t</sup>Bu<sup>Ph</sup>DzPz)<sub>2</sub>Ln, and heteroleptic (<sup>Ph</sup>DzPz)Ln(<sup>Bu</sup>Pc) complexes in DCM solution

| Compd                                                      | $\lambda_{\max}$ , nm (log $\epsilon$ ) |                |                |               |           |           |                            | Ref. |
|------------------------------------------------------------|-----------------------------------------|----------------|----------------|---------------|-----------|-----------|----------------------------|------|
|                                                            | Reduced state                           |                |                | Neutral state |           |           |                            |      |
|                                                            | B(Soret)                                | Q <sub>1</sub> | Q <sub>2</sub> | B(Soret)      | Q         | RV        | IV <sup>a</sup>            |      |
| ( <sup>Bu</sup> Pc) <sub>2</sub> Lu <sup>b</sup>           | 345                                     | 637            | 711            | 351           | 675       | 930       | -                          | [2]  |
| ( <sup>t</sup> Bu <sup>Ph</sup> DzPz)Lu( <sup>Bu</sup> Pc) | 357(5.06)                               | 636(4.96)      | 724(4.67)      | 365(5.06)     | 668(4.98) | 897(3.8)  | 1214sh,<br>1306            | tw   |
| ( <sup>t</sup> Bu <sup>Ph</sup> DzPz) <sub>2</sub> Lu      | 369(5.09)                               | 620(4.86)      | 722(4.78)      | 377           | 653(5.00) | 865(3.91) | 1216sh,<br>1305            | [1]  |
| ( <sup>Bu</sup> Pc) <sub>2</sub> Eu <sup>b</sup>           | 347                                     | 651            | 698            | 357           | 691       | -         | -                          | [2]  |
| ( <sup>t</sup> Bu <sup>Ph</sup> DzPz)Eu( <sup>Bu</sup> Pc) | 355(5.19)                               | 642(5.06)      | 702(4.83)      | 356(5.20)     | 676(4.99) | 879(3.73) | 1347sh<br>1473             | tw   |
| ( <sup>t</sup> Bu <sup>Ph</sup> DzPz) <sub>2</sub> Eu      | 368(5.20)                               | 631(5.03)      | 699(4.89)      | 380           | 660(5.13) | 853       | 1195sh,<br>1376sh,<br>1476 | [1]  |
| ( <sup>Bu</sup> Pc) <sub>2</sub> La                        |                                         | 652            | -              | -             | -         | -         | -                          | tw   |
| ( <sup>t</sup> Bu <sup>Ph</sup> DzPz)La( <sup>Bu</sup> Pc) | 354(5.09)                               | 654(5.20)      | -              | -             | -         | -         | -                          | tw   |
| ( <sup>t</sup> Bu <sup>Ph</sup> DzPz) <sub>2</sub> La      | 373(5.25)                               | 638(5.31)      | 674(5.02)      | 365           | 671(5.25) | 839       | 1780                       | [1]  |

<sup>a</sup>The spectra were recorded in CCl<sub>4</sub>. <sup>b</sup>The spectra were recorded in *o*-DCB.

## Electrochemistry

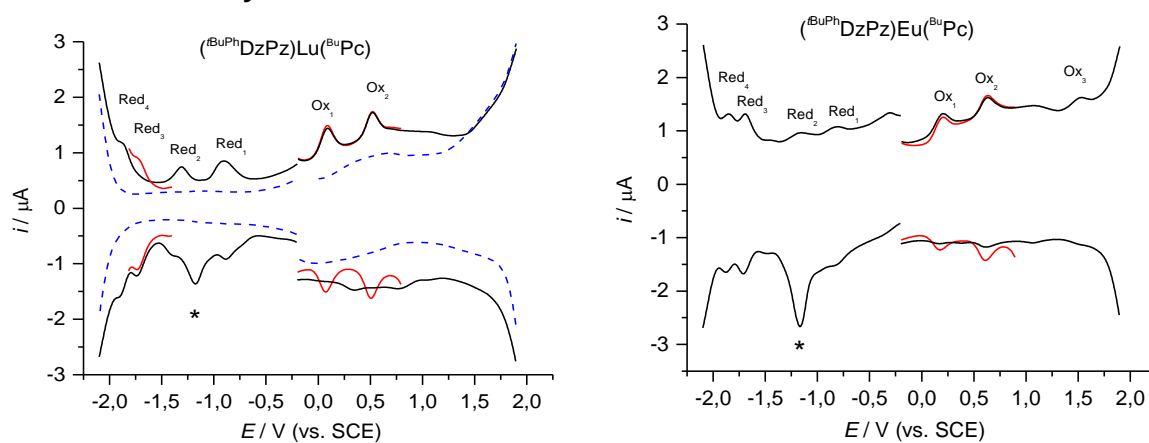

**Figure S16** SWVA of  $(t\text{BuPhDzPz})\text{Ln}(\text{BuPc})$  (0.24 mM (Ln = Lu) or 0.36 mM (Ln = Eu), *o*-DCB, 0.1 M TBABF<sub>4</sub>, frequency of 10 Hz; amplitude of 50 mV; step potential of 5 mV).  $E_{1/2}(\text{Fc}^+/\text{Fc}) = 0.548$  V. \* - irregular irreversible peak, probably, owing to traces of contaminants in the samples.

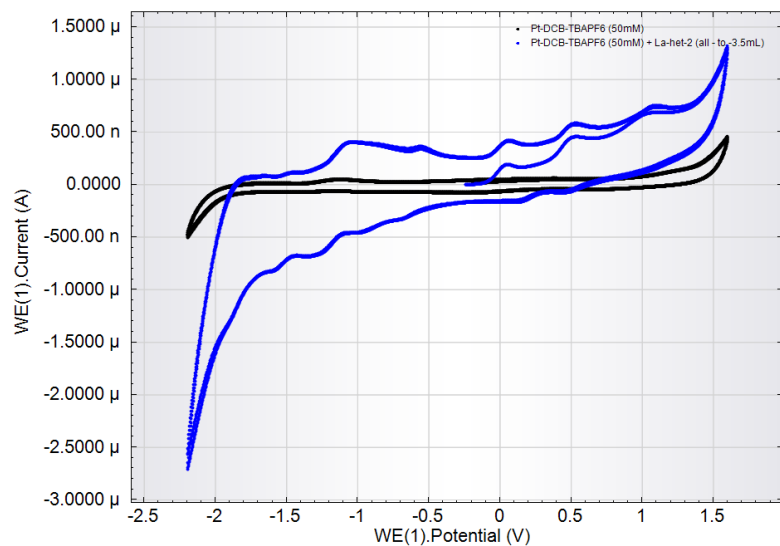

**Figure S17** CV of Pt 1 mm electrode in DCB+TBAPF<sub>6</sub> soln (3.5 mL+68 mg ~ 50 mM = BG) – black points. The blue curve was measured after complete dissolution of  $(t\text{BuPhDzPz})\text{La}(\text{BuPc})$  portion in 3.5 mL BG soln. under argon. Potentials are given vs Ag/Ag<sup>+</sup>(10 mM, AN),  $E_{1/2}(\text{Fc}^+/\text{Fc}^+) \text{ vs Ag/Ag}^+ \sim 0.27\text{V}$ .

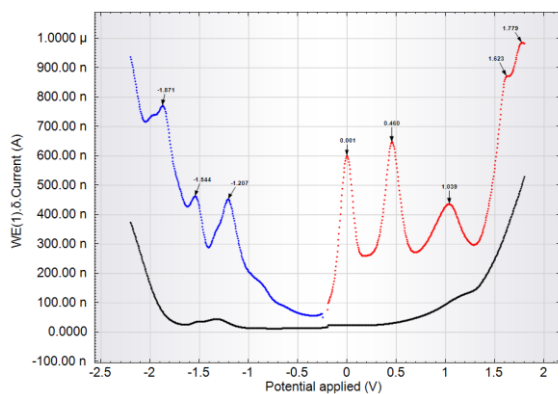

**Figure S18** SWV of Pt 1mm electrode in DCB+TBAPF<sub>6</sub> soln (3.5 mL+68 mg ~ 50 mM = BG) – black points. Blue/Red curves (from open circuit potential to cathodic and anodic direction) were measured after the CV test (Figure S16). Potentials are given vs Ag/Ag<sup>+</sup>(10 mM, AN).

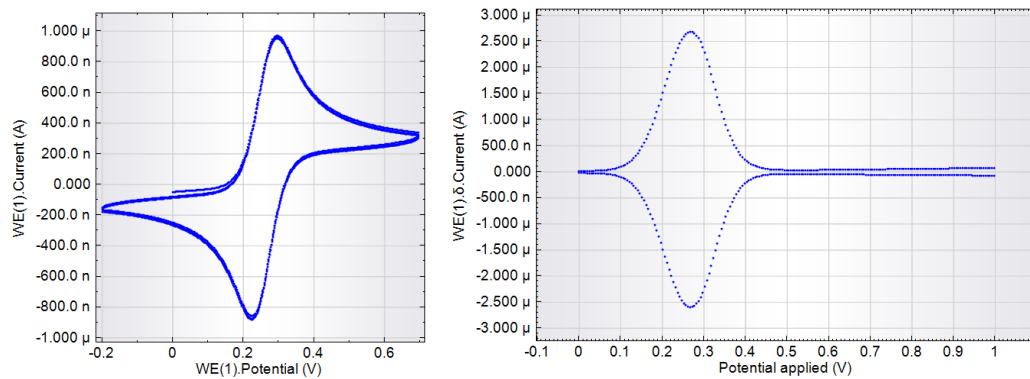

**Figure S19** CV (left) and SWV (right) of Fc/Fc<sup>+</sup> (~1 mM) couple in 0.1 M TBAPF<sub>6</sub> DCB solution. Measured vs Ag/Ag<sup>+</sup> (0.01 M AN) RE, WE = 1 mm diam. Pt. E<sub>1/2</sub>(Fc/Fc<sup>+</sup>) vs Ag/Ag<sup>+</sup> ~ 0.27V.

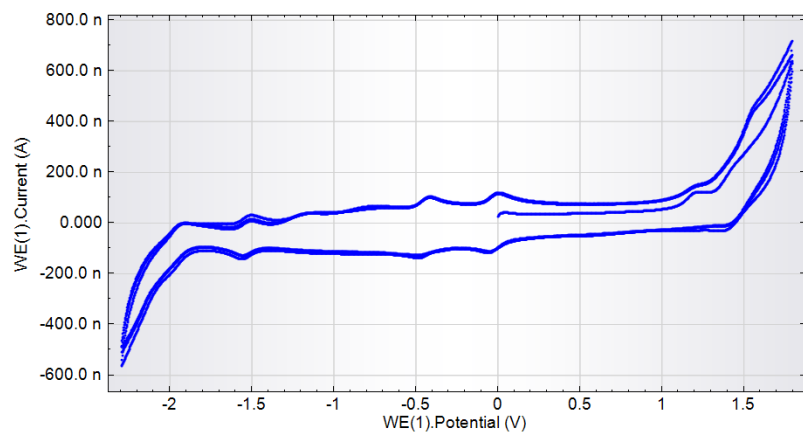

**Figure S20** CV of (BuPc)<sub>2</sub>Lu sample (2.1 mg in 10 mL DCB) in 0.1 M TBAPF<sub>6</sub> DCB solution. Measured vs Ag/Ag<sup>+</sup> (0.01 M AN) RE, WE = 1mm diam. Pt

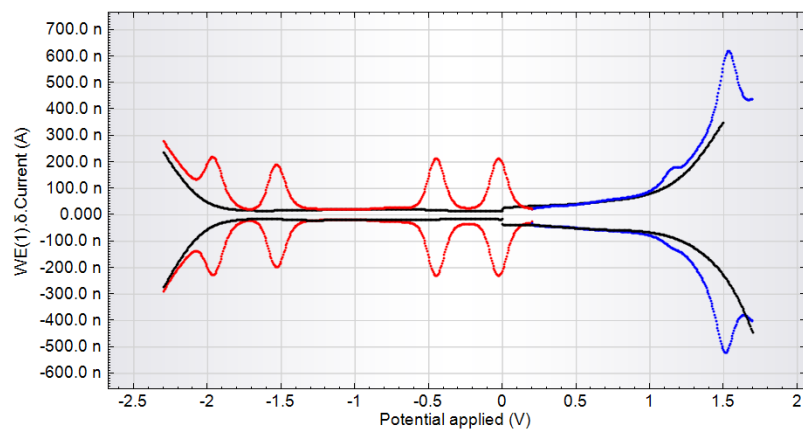

**Figure S21** SWV of (BuPc)<sub>2</sub>Lu sample (2.1 mg in 10 mL DCB) in 0.1 M TBAPF<sub>6</sub> DCB solution. Measured vs Ag/Ag<sup>+</sup> (0.01 M AN) RE, WE = 1 mm diam. Pt

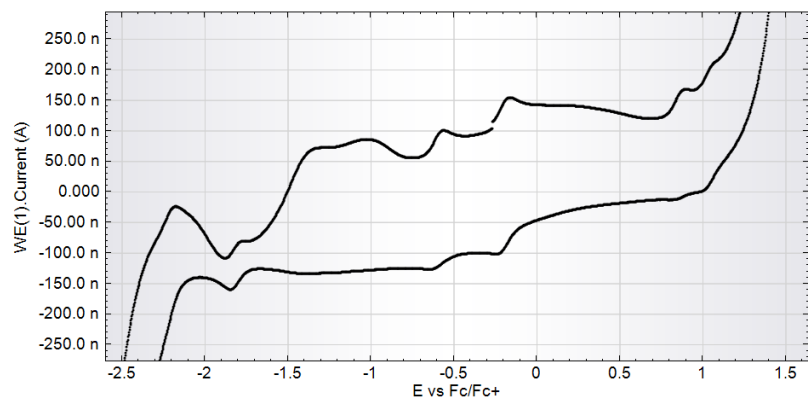

**Figure S22** SWV of  $(^{Bu}Pc)_2Eu$  sample (1.54 mg in 10 mL DCB) in 0.1 M TBAPF<sub>6</sub> DCB solution. Measured vs Ag/Ag<sup>+</sup> (0.01M AN) RE, converted to Fc/Fc<sup>+</sup> scale. WE: Pt 1mm diam.

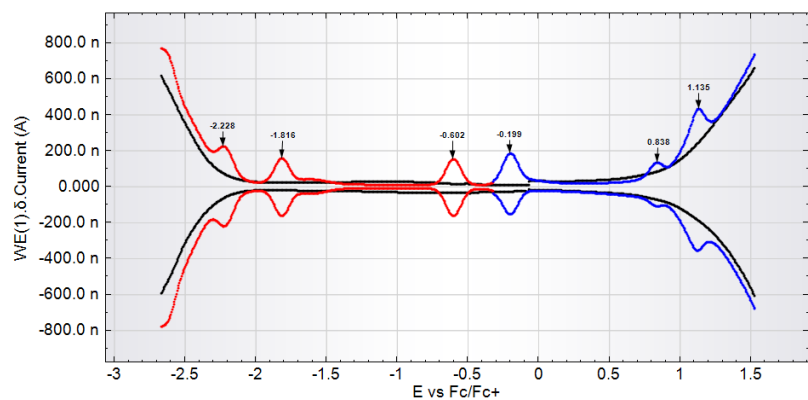

**Figure S23** SWV of  $(^{Bu}Pc)_2Eu$  sample (1.54 mg in 10 mL DCB) in 0.1M TBAPF<sub>6</sub> DCB solution. Measured vs Ag/Ag<sup>+</sup> (0.01M AN) RE, converted to Fc/Fc<sup>+</sup> scale. WE: Pt 1 mm diam.

## DFT calculation details

Table S2 Optimized geometry of (PhDzPz)Lu(BuPc)

-----  
CARTESIAN COORDINATES (ANGSTROM)

|   |              |              |              |   |              |              |              |
|---|--------------|--------------|--------------|---|--------------|--------------|--------------|
| C | -4.194169000 | 0.710157000  | 1.872918000  | C | -3.481667000 | -2.420552000 | -1.239611000 |
| C | -4.192177000 | -0.701250000 | 1.880071000  | C | -2.495537000 | -3.434002000 | -1.233641000 |
| C | -2.782643000 | -1.114638000 | 1.820375000  | C | -1.198670000 | -2.734232000 | -1.128537000 |
| C | -2.782840000 | 1.122285000  | 1.815958000  | C | -4.967373000 | 7.564599000  | -1.548247000 |
| C | 0.710098000  | 4.194193000  | 1.872788000  | C | -2.755040000 | -1.140667000 | -1.130931000 |
| C | -0.701305000 | 4.192140000  | 1.879954000  | C | 4.979893000  | 7.611069000  | -1.067431000 |
| C | -1.114648000 | 2.782597000  | 1.820280000  | C | 5.049164000  | 8.962624000  | -1.437325000 |
| C | 1.122269000  | 2.782861000  | 1.815900000  | C | 4.006361000  | 9.548015000  | -2.173563000 |
| C | 4.194120000  | -0.710110000 | 1.872901000  | C | 2.890067000  | 8.768283000  | -2.534855000 |
| C | 4.192092000  | 0.701293000  | 1.880082000  | C | 2.824495000  | 7.418367000  | -2.175148000 |
| C | 2.782557000  | 1.114664000  | 1.820337000  | C | -5.459524000 | -3.616481000 | -1.099955000 |
| C | 2.782788000  | -1.122255000 | 1.815950000  | C | -4.778511000 | -4.659107000 | -0.216742000 |
| C | -0.710158000 | -4.194167000 | 1.872982000  | C | -3.731909000 | -5.391420000 | -1.046307000 |
| C | 0.701247000  | -4.192088000 | 1.880086000  | C | 7.543062000  | 2.569189000  | -1.968645000 |
| C | 1.114573000  | -2.782545000 | 1.820349000  | C | 8.883382000  | 2.628158000  | -2.364353000 |
| C | -1.122349000 | -2.782843000 | 1.816042000  | C | -3.616416000 | 5.459421000  | -1.100459000 |
| N | 0.003419000  | 1.978577000  | 1.711374000  | C | -4.659150000 | 4.778481000  | -0.217312000 |
| N | -2.394643000 | 2.400117000  | 1.849576000  | C | -5.391381000 | 3.731717000  | -1.046740000 |
| N | 1.978527000  | -0.003388000 | 1.711413000  | C | 9.571724000  | 3.857501000  | -2.365287000 |
| N | 2.400101000  | 2.394672000  | 1.849582000  | C | 8.903871000  | 5.026038000  | -1.963807000 |
| N | -0.003499000 | -1.978550000 | 1.711472000  | C | 5.459536000  | 3.616254000  | -1.100437000 |
| N | -2.400177000 | -2.394642000 | 1.849688000  | C | 4.778623000  | 4.658965000  | -0.217235000 |
| N | 2.394575000  | -2.400074000 | 1.849583000  | C | 3.731951000  | 5.391244000  | -1.046719000 |
| N | -1.978592000 | 0.003410000  | 1.711436000  | C | 7.564656000  | 4.967221000  | -1.548433000 |
| C | -2.420457000 | 3.481568000  | -1.239862000 | C | 6.863679000  | 3.740736000  | -1.544468000 |
| C | -3.433896000 | 2.495432000  | -1.233891000 | C | 3.873256000  | 6.811034000  | -1.436225000 |
| C | -2.734126000 | 1.198585000  | -1.128615000 | C | -3.873194000 | -6.811222000 | -1.435763000 |
| C | -7.418633000 | 2.823642000  | -2.174420000 | C | -6.863682000 | -3.741019000 | -1.543916000 |
| C | -1.140572000 | 2.754966000  | -1.131014000 | C | -6.811220000 | 3.872819000  | -1.436146000 |
| C | 3.481653000  | 2.420370000  | -1.239841000 | C | -3.740920000 | 6.863564000  | -1.544486000 |
| C | 2.495546000  | 3.433838000  | -1.233873000 | C | -4.979831000 | -7.611260000 | -1.066982000 |
| C | 1.198679000  | 2.734084000  | -1.128625000 | C | -5.049154000 | -8.962786000 | -1.436967000 |
| C | -2.569405000 | 7.542949000  | -1.968766000 | C | -4.006390000 | -9.548151000 | -2.173282000 |
| C | 2.755026000  | 1.140505000  | -1.130994000 | C | -2.890075000 | -8.768425000 | -2.534530000 |
| C | -2.628373000 | 8.883301000  | -2.364357000 | C | -2.824480000 | -7.418524000 | -2.174778000 |
| C | 2.420453000  | -3.481719000 | -1.239880000 | C | -7.542929000 | -2.569605000 | -1.968701000 |
| C | 3.433898000  | -2.495594000 | -1.233869000 | C | -8.883264000 | -2.628585000 | -2.364345000 |
| C | 2.734126000  | -1.198744000 | -1.128571000 | C | -9.571801000 | -3.857819000 | -2.364582000 |
| C | -3.857692000 | 9.571690000  | -2.365090000 | C | -8.904084000 | -5.026243000 | -1.962561000 |
| C | 1.140576000  | -2.755117000 | -1.130992000 | C | -7.564859000 | -4.967396000 | -1.547223000 |
| C | -5.026203000 | 8.903836000  | -1.963549000 | C | -7.611169000 | 4.979740000  | -1.068034000 |

|   |               |               |              |    |              |               |              |
|---|---------------|---------------|--------------|----|--------------|---------------|--------------|
| C | -8.962734000  | 5.048860000   | -1.437913000 | N  | -4.811558000 | -2.533620000  | -1.444074000 |
| C | -9.548219000  | 4.005628000   | -2.173468000 | N  | -2.637806000 | -4.766622000  | -1.407674000 |
| C | -8.768567000  | 2.889055000   | -2.534081000 | N  | -2.533509000 | 4.811453000   | -1.444411000 |
| H | -6.791428000  | 1.958652000   | -2.440008000 | N  | -4.766515000 | 2.637622000   | -1.407987000 |
| H | -1.621360000  | 6.982728000   | -1.961401000 | N  | 4.811539000  | 2.533377000   | -1.444425000 |
| H | -1.706094000  | 9.401656000   | -2.675729000 | N  | 2.637806000  | 4.766456000   | -1.407984000 |
| H | -3.902873000  | 10.627757000  | -2.678544000 | N  | -1.381349000 | 1.408128000   | -0.962236000 |
| H | -5.994960000  | 9.429635000   | -1.968237000 | C  | 2.569366000  | -7.543148000  | -1.968621000 |
| H | -5.894613000  | 7.053572000   | -1.254536000 | C  | 7.418698000  | -2.823841000  | -2.174236000 |
| H | 5.794973000   | 7.189535000   | -0.460932000 | C  | 8.768670000  | -2.889251000  | -2.533761000 |
| H | 4.059600000   | 10.610995000  | -2.461371000 | C  | 9.548295000  | -4.005808000  | -2.173049000 |
| H | 2.063126000   | 9.221221000   | -3.106949000 | C  | 8.962764000  | -5.049002000  | -1.437473000 |
| H | 1.959662000   | 6.791134000   | -2.441179000 | C  | 7.611167000  | -4.979876000  | -1.067708000 |
| H | 6.982851000   | 1.621138000   | -1.961188000 | C  | 5.391371000  | -3.731873000  | -1.046649000 |
| H | 9.401771000   | 1.705859000   | -2.675612000 | C  | 4.659091000  | -4.778641000  | -0.217284000 |
| H | 10.627801000  | 3.902662000   | -2.678705000 | C  | 3.616386000  | -5.459565000  | -1.100483000 |
| H | 9.429633000   | 5.994813000   | -1.968720000 | C  | 3.740896000  | -6.863719000  | -1.544465000 |
| H | 7.053599000   | 5.894458000   | -1.254766000 | C  | 6.811228000  | -3.873001000  | -1.435987000 |
| H | -4.225941000  | -4.096317000  | 0.575999000  | C  | 4.967393000  | -7.564676000  | -1.548369000 |
| H | -5.504724000  | -5.335000000  | 0.270672000  | C  | 5.026243000  | -8.903912000  | -1.963677000 |
| H | -4.096431000  | 4.226055000   | 0.575581000  | C  | 3.857721000  | -9.571813000  | -2.365115000 |
| H | -5.335115000  | 5.504746000   | 0.269932000  | C  | 2.628368000  | -8.883486000  | -2.364262000 |
| H | 4.226148000   | 4.096227000   | 0.575608000  | H  | 1.621309000  | -6.982947000  | -1.961232000 |
| H | 5.504935000   | 5.334851000   | 0.270041000  | H  | 6.791541000  | -1.958812000  | -2.439808000 |
| H | 5.921147000   | 9.564892000   | -1.134572000 | H  | 9.221702000  | -2.062039000  | -3.105388000 |
| H | -5.794892000  | -7.189720000  | -0.460462000 | H  | 10.611336000 | -4.058883000  | -2.460659000 |
| H | -5.921131000  | -9.565060000  | -1.134213000 | H  | 9.564954000  | -5.921188000  | -1.135153000 |
| H | -4.059623000  | -10.611132000 | -2.461087000 | H  | 7.189489000  | -5.795320000  | -0.461794000 |
| H | -2.063192000  | -9.221330000  | -3.106735000 | H  | 5.335008000  | -5.504943000  | 0.269968000  |
| H | -1.959658000  | -6.791284000  | -2.440834000 | H  | 4.096339000  | -4.226220000  | 0.575589000  |
| H | -6.982571000  | -1.621637000  | -1.961796000 | H  | 5.894628000  | -7.053577000  | -1.254756000 |
| H | -9.401518000  | -1.706363000  | -2.676056000 | H  | 5.995022000  | -9.429669000  | -1.968495000 |
| H | -10.627862000 | -3.903004000  | -2.678054000 | H  | 3.902910000  | -10.627895000 | -2.678515000 |
| H | -9.430007000  | -5.994933000  | -1.966791000 | H  | 1.706074000  | -9.401915000  | -2.675468000 |
| H | -7.053967000  | -5.894588000  | -1.253144000 | N  | 4.766530000  | -2.637769000  | -1.407920000 |
| H | -7.189540000  | 5.795178000   | -0.462083000 | N  | 2.533490000  | -4.811604000  | -1.444468000 |
| H | -9.564939000  | 5.921068000   | -1.135686000 | Lu | -0.000024000 | -0.000033000  | 0.374799000  |
| H | -10.611229000 | 4.058708000   | -2.461191000 | C  | -0.721536000 | 6.610014000   | 1.723599000  |
| H | -9.221571000  | 2.061796000   | -3.105661000 | C  | 0.712953000  | 6.613388000   | 1.716576000  |
| N | 1.408194000   | 1.381302000   | -0.962233000 | C  | -1.418312000 | 5.387931000   | 1.833919000  |
| N | 0.034793000   | 3.377911000   | -1.183851000 | C  | 1.419829000  | 5.395237000   | 1.818109000  |
| N | 1.381348000   | -1.408282000  | -0.962173000 | C  | -1.487568000 | 7.911382000   | 1.569890000  |
| N | 3.377963000   | -0.034865000  | -1.183797000 | C  | -3.004412000 | 7.832163000   | 1.770367000  |
| N | -1.408193000  | -1.381441000  | -0.962233000 | C  | -3.715614000 | 9.169506000   | 1.528811000  |
| N | -3.377969000  | 0.034704000   | -1.183786000 | C  | -5.226491000 | 9.088666000   | 1.771634000  |
| N | -0.034791000  | -3.378067000  | -1.183797000 | C  | 1.466762000  | 7.920303000   | 1.559800000  |



|   |              |              |             |   |              |               |             |
|---|--------------|--------------|-------------|---|--------------|---------------|-------------|
| C | 2.951554000  | 7.899185000  | 1.942336000 | H | 8.262669000  | -1.370480000  | 0.499852000 |
| C | 3.609353000  | 9.281405000  | 1.838208000 | H | 8.710555000  | -0.962352000  | 2.162482000 |
| C | 5.082330000  | 9.279228000  | 2.260456000 | H | 7.508022000  | -3.060105000  | 2.982134000 |
| H | -2.516086000 | 5.359958000  | 1.848854000 | H | 7.193700000  | -3.505253000  | 1.283089000 |
| H | 2.518759000  | 5.376257000  | 1.817166000 | H | 9.643338000  | -3.521560000  | 0.788113000 |
| H | -1.076128000 | 8.669513000  | 2.277349000 | H | 10.008696000 | -3.043279000  | 2.467392000 |
| H | -1.279724000 | 8.327554000  | 0.553966000 | H | 8.570699000  | -5.676726000  | 1.639460000 |
| H | -3.436614000 | 7.081153000  | 1.073557000 | H | 10.286457000 | -5.542055000  | 2.153160000 |
| H | -3.224431000 | 7.466256000  | 2.801324000 | H | 8.965276000  | -5.199630000  | 3.322807000 |
| H | -3.270863000 | 9.954418000  | 2.185865000 | C | 0.721576000  | -6.609963000  | 1.723864000 |
| H | -3.523991000 | 9.493457000  | 0.479849000 | C | -0.712918000 | -6.613386000  | 1.716987000 |
| H | -5.691128000 | 8.315751000  | 1.118172000 | C | 1.418304000  | -5.387849000  | 1.834066000 |
| H | -5.454741000 | 8.816787000  | 2.827521000 | C | -1.419836000 | -5.395256000  | 1.818462000 |
| H | -5.730284000 | 10.056430000 | 1.553611000 | C | 1.487650000  | -7.911318000  | 1.570250000 |
| H | 1.370549000  | 8.262510000  | 0.499286000 | C | 3.004520000  | -7.831954000  | 1.770461000 |
| H | 0.962189000  | 8.710713000  | 2.161768000 | C | 3.715819000  | -9.169251000  | 1.528950000 |
| H | 3.059860000  | 7.508307000  | 2.981915000 | C | 5.226723000  | -9.088218000  | 1.771547000 |
| H | 3.505289000  | 7.193872000  | 1.282963000 | C | -1.466676000 | -7.920344000  | 1.560349000 |
| H | 3.521521000  | 9.643435000  | 0.787752000 | C | -2.951439000 | -7.899266000  | 1.942969000 |
| H | 3.042839000  | 10.008952000 | 2.466876000 | C | -3.609236000 | -9.281483000  | 1.838806000 |
| H | 5.676633000  | 8.571128000  | 1.639745000 | C | -5.082184000 | -9.279331000  | 2.261162000 |
| H | 5.541647000  | 10.286950000 | 2.153140000 | H | 2.516077000  | -5.359796000  | 1.848950000 |
| H | 5.199107000  | 8.965919000  | 3.322915000 | H | -2.518769000 | -5.376344000  | 1.817572000 |
| C | 6.609976000  | 0.721491000  | 1.723915000 | H | 1.076368000  | -8.669352000  | 2.277907000 |
| C | 6.613328000  | -0.713002000 | 1.716908000 | H | 1.279657000  | -8.327677000  | 0.554434000 |
| C | 5.387898000  | 1.418285000  | 1.834165000 | H | 3.436531000  | -7.080990000  | 1.073483000 |
| C | 5.395158000  | -1.419858000 | 1.818313000 | H | 3.224677000  | -7.465897000  | 2.801335000 |
| C | 7.911387000  | 1.487494000  | 1.570424000 | H | 3.271247000  | -9.954140000  | 2.186155000 |
| C | 7.832142000  | 3.004336000  | 1.770905000 | H | 3.524085000  | -9.493340000  | 0.480051000 |
| C | 9.169483000  | 3.715585000  | 1.529480000 | H | 5.691170000  | -8.315308000  | 1.117945000 |
| C | 9.088566000  | 5.226441000  | 1.772422000 | H | 5.455096000  | -8.816226000  | 2.827378000 |
| C | 7.920252000  | -1.466828000 | 1.560284000 | H | 5.730598000  | -10.055939000 | 1.553526000 |
| C | 7.899000000  | -2.951671000 | 1.942605000 | H | -1.370499000 | -8.262628000  | 0.499857000 |
| C | 9.281169000  | -3.609577000 | 1.838506000 | H | -0.962019000 | -8.710681000  | 2.162345000 |
| C | 9.278770000  | -5.082651000 | 2.260424000 | H | -3.059704000 | -7.508448000  | 2.982576000 |
| H | 5.359920000  | 2.516057000  | 1.849074000 | H | -3.505211000 | -7.193913000  | 1.283668000 |
| H | 5.376163000  | -2.518789000 | 1.817329000 | H | -3.521482000 | -9.643460000  | 0.788325000 |
| H | 8.669391000  | 1.076019000  | 2.278001000 | H | -3.042676000 | -10.009065000 | 2.467393000 |
| H | 8.327718000  | 1.279651000  | 0.554566000 | H | -5.676527000 | -8.571200000  | 1.640526000 |
| H | 7.081187000  | 3.436517000  | 1.074021000 | H | -5.541509000 | -10.287047000 | 2.153827000 |
| H | 7.466139000  | 3.224345000  | 2.801829000 | H | -5.198880000 | -8.966073000  | 3.323645000 |
| H | 9.954370000  | 3.270802000  | 2.186544000 | C | -6.610067000 | -0.721308000  | 1.723846000 |
| H | 9.493506000  | 3.524069000  | 0.480521000 | C | -6.613378000 | 0.713187000   | 1.716960000 |
| H | 8.315676000  | 5.691085000  | 1.118937000 | C | -5.388026000 | -1.418167000  | 1.834095000 |
| H | 8.816607000  | 5.454589000  | 2.828311000 | C | -5.395165000 | 1.419972000   | 1.818360000 |
| H | 10.056318000 | 5.730298000  | 1.554500000 | C | -7.911493000 | -1.487272000  | 1.570404000 |

|   |              |              |             |   |               |              |             |
|---|--------------|--------------|-------------|---|---------------|--------------|-------------|
| C | -7.832393000 | -3.004069000 | 1.771304000 | H | -9.494007000  | -3.523807000 | 0.481247000 |
| C | -9.169874000 | -3.715169000 | 1.530201000 | H | -8.316498000  | -5.690913000 | 1.119925000 |
| C | -9.089196000 | -5.225987000 | 1.773434000 | H | -8.817103000  | -5.453967000 | 2.829326000 |
| C | -7.920238000 | 1.467104000  | 1.560273000 | H | -10.057084000 | -5.729701000 | 1.555787000 |
| C | -7.898898000 | 2.951935000  | 1.942625000 | H | -8.262608000  | 1.370793000  | 0.499823000 |
| C | -9.281008000 | 3.609952000  | 1.838448000 | H | -8.710612000  | 0.962673000  | 2.162417000 |
| C | -9.278513000 | 5.083024000  | 2.260375000 | H | -7.507987000  | 3.060331000  | 2.982182000 |
| H | -5.360150000 | -2.515947000 | 1.848942000 | H | -7.193504000  | 3.505472000  | 1.283171000 |
| H | -5.376093000 | 2.518902000  | 1.817516000 | H | -9.643135000  | 3.521967000  | 0.788038000 |
| H | -8.669566000 | -1.075587000 | 2.277779000 | H | -10.008619000 | 3.043709000  | 2.467287000 |
| H | -8.327695000 | -1.279670000 | 0.554438000 | H | -8.570375000  | 5.677052000  | 1.639443000 |
| H | -7.081560000 | -3.436576000 | 1.074487000 | H | -10.286161000 | 5.542507000  | 2.153075000 |
| H | -7.466331000 | -3.223821000 | 2.802263000 | H | -8.965052000  | 5.199974000  | 3.322771000 |
| H | -9.954596000 | -3.270117000 | 2.187282000 |   |               |              |             |

**Table S3** Second Order Perturbation Theory Analysis of Fock Matrix in NBOBasis for (**PhDzPz**) Lu (**BuPc**)

Threshold for printing: 0.25 kcal/mol

(Intermolecular threshold: 0.03 kcal/mol)

| Donor NBO (i)                                                 | Acceptor NBO (j)            | E(2)<br>kcal/mol | E(j)-E(i)<br>a.u. | F(i,j)<br>a.u. |
|---------------------------------------------------------------|-----------------------------|------------------|-------------------|----------------|
| =====                                                         |                             |                  |                   |                |
| from unit 1( <b>BuPc</b> ) to unit 2( <b>PhDzPz</b> )         |                             |                  |                   |                |
| $\pi$ - $\pi$ donor interaction                               |                             |                  |                   |                |
| BD ( 2) C 4 - N 18                                            | /***. BD*( 2) C 27 - N 127  | 0.50             | 0.26              | 0.015          |
| BD ( 2) C 7 - N 17                                            | /***. BD*( 2) C 29 - N 123  | 0.38             | 0.25              | 0.013          |
| BD ( 2) C 8 - N 20                                            | /***. BD*( 2) C 32 - N 122  | 0.32             | 0.24              | 0.012          |
| BD ( 2) C 11 - N 19                                           | /***. BD*( 2) C 34 - N 125  | 0.38             | 0.25              | 0.013          |
| BD ( 2) C 12 - N 23                                           | /***. BD*( 2) C 38 - N 124  | 0.32             | 0.24              | 0.012          |
| BD ( 2) C 15 - N 21                                           | /***. BD*( 2) C 40 - N 128  | 0.38             | 0.25              | 0.013          |
| LP*( 1) C 16                                                  | /***. BD*( 2) C 44 - N 126  | 1.79             | 0.09              | 0.019          |
| BD*( 2) C 7 - N 17                                            | /***. BD*( 2) C 29 - N 123  | 2.80             | 0.02              | 0.015          |
| BD*( 2) C 11 - N 19                                           | /***. BD*( 2) C 34 - N 125  | 2.80             | 0.02              | 0.015          |
| BD*( 2) C 15 - N 21                                           | /***. BD*( 2) C 40 - N 128  | 2.80             | 0.02              | 0.015          |
| hydrogen bonds between N <sub>meso</sub> to C-H <sub>ax</sub> |                             |                  |                   |                |
| LP ( 1) N 18                                                  | /***. BD*( 1) C 58 - H 103  | 0.53             | 0.63              | 0.023          |
| LP ( 1) N 20                                                  | /***. BD*( 1) C 63 - H 105  | 0.53             | 0.63              | 0.023          |
| LP ( 1) N 22                                                  | /***. BD*( 1) C 53 - H 101  | 0.53             | 0.63              | 0.023          |
| LP ( 1) N 23                                                  | /***. BD*( 1) C 143 - H 158 | 0.52             | 0.63              | 0.023          |
| from unit 2( <b>PhDzPz</b> ) to unit 1( <b>BuPc</b> )         |                             |                  |                   |                |
| $\pi$ - $\pi$ donor interaction                               |                             |                  |                   |                |
| BD ( 2) C 27 - N 127                                          | /***. BD*( 2) C 1 - C 265   | 0.13             | 0.30              | 0.008          |
| BD ( 2) C 27 - N 127                                          | /***. BD*( 2) C 4 - N 18    | 0.52             | 0.25              | 0.015          |
| BD ( 2) C 34 - N 125                                          | /***. BD*( 2) C 10 - C 200  | 0.13             | 0.30              | 0.008          |
| BD ( 2) C 34 - N 125                                          | /***. BD*( 2) C 11 - N 19   | 0.35             | 0.23              | 0.012          |
| BD ( 2) C 38 - N 124                                          | /***. BD*( 2) C 12 - N 23   | 0.43             | 0.25              | 0.013          |
| BD ( 2) C 40 - N 128                                          | /***. BD*( 2) C 14 - C 232  | 0.13             | 0.30              | 0.008          |
| BD ( 2) C 40 - N 128                                          | /***. BD*( 2) C 15 - N 21   | 0.35             | 0.23              | 0.012          |
| BD ( 2) C 44 - N 126                                          | /558. LP*( 1) C 16          | 1.18             | 0.15              | 0.019          |
| LP*( 1) C 46                                                  | /***. BD*( 2) C 3 - N 22    | 1.52             | 0.10              | 0.020          |
| BD*( 2) C 32 - N 122                                          | /***. BD*( 2) C 8 - N 20    | 3.63             | 0.02              | 0.015          |
| BD*( 2) C 38 - N 124                                          | /***. BD*( 2) C 12 - N 23   | 3.63             | 0.02              | 0.015          |
